# Supplementary material for: Preparation and performance of a novel magnetic conductive imprinted photocatalyst for selective photodegradation of antibiotic solution
Source: Royal Society of Chemistry journal article supplement (doi:10.1039/c3ra42738b), 2013-01-01
Supplement: c3ra42738b.pdf [file c3ra42738b.pdf]

Electronic Supplementary Information

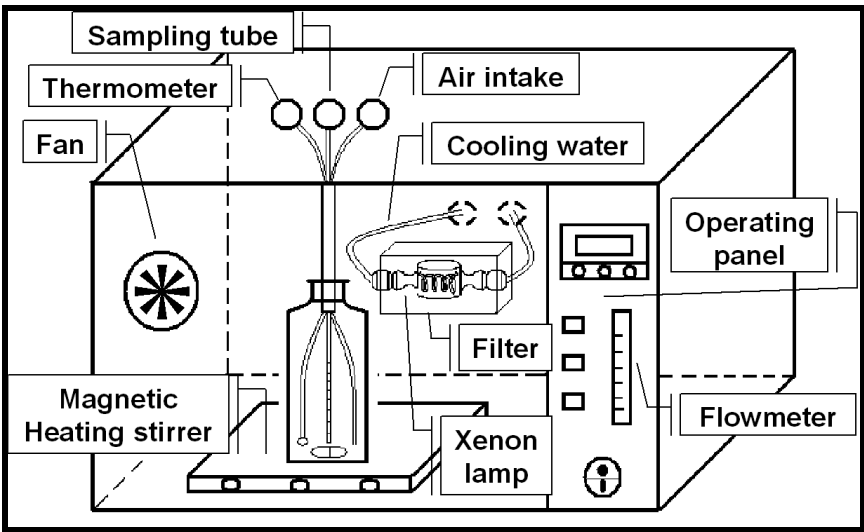

Fig. S1 The photocatalytic reactor

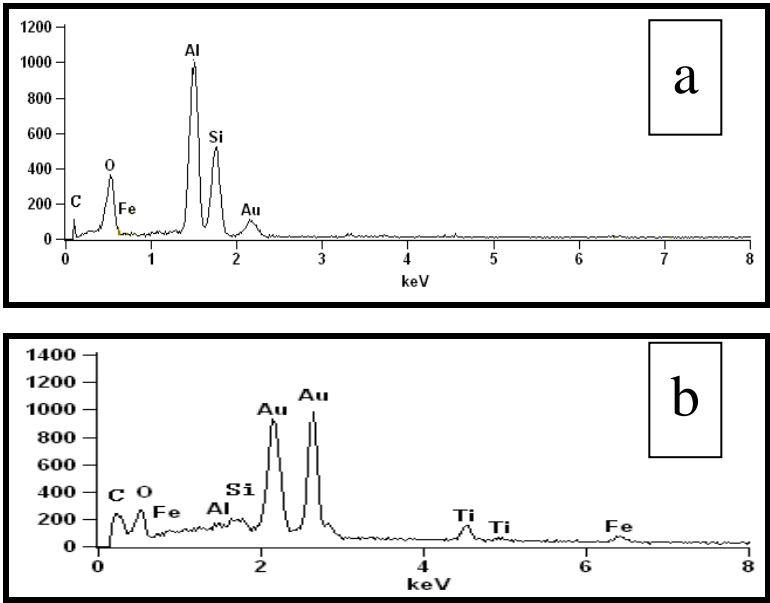

Fig. S2 The EDS spectra of FC (a) and MCIP (b)

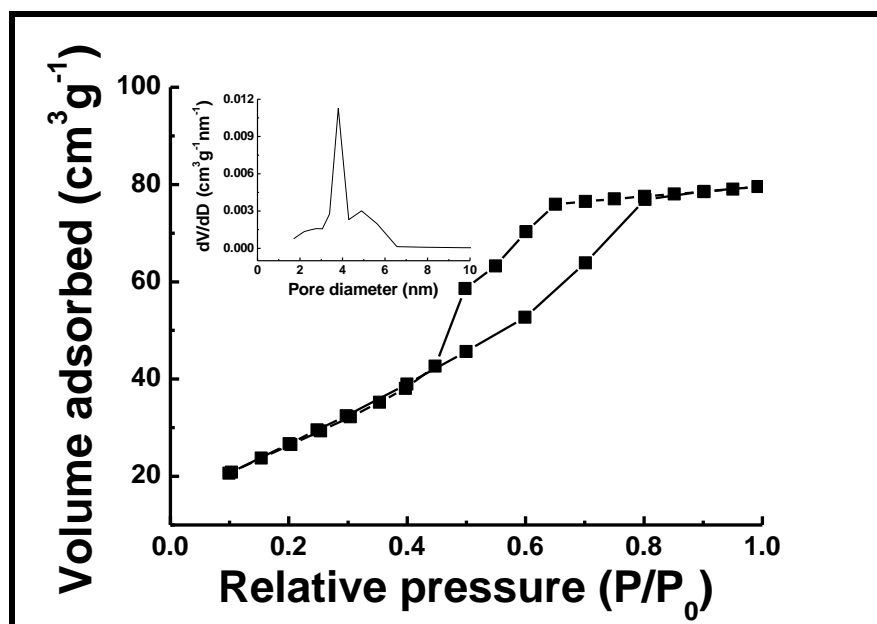

Fig. S3 N<sub>2</sub> adsorption-desorption isotherm and corresponding pore size distribution curve (inset)

of MCIP

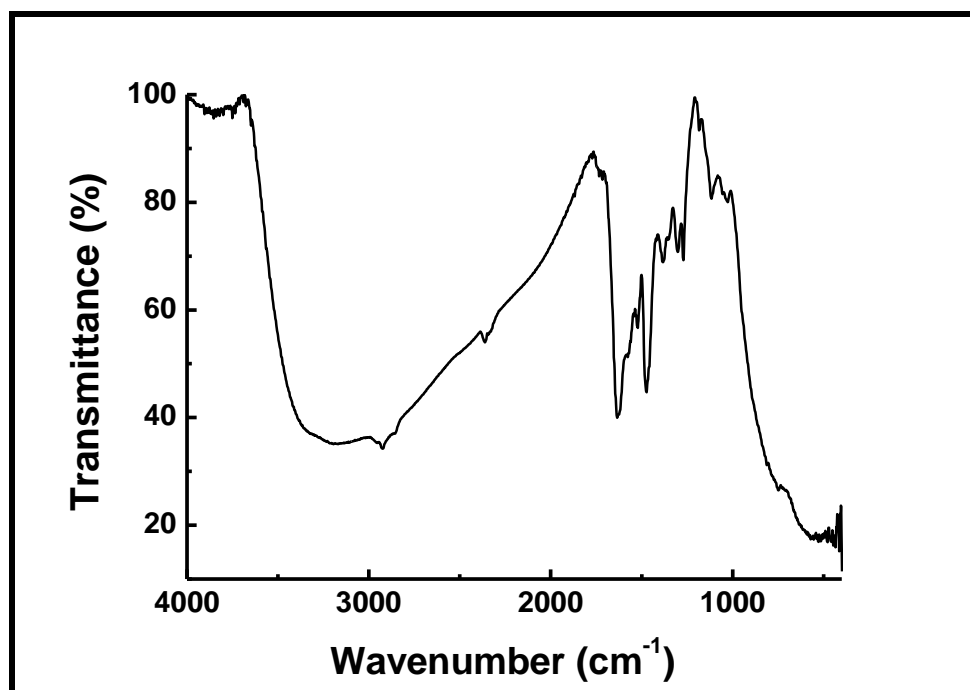

Fig. S4 The FT-IR spectrum of MCIP

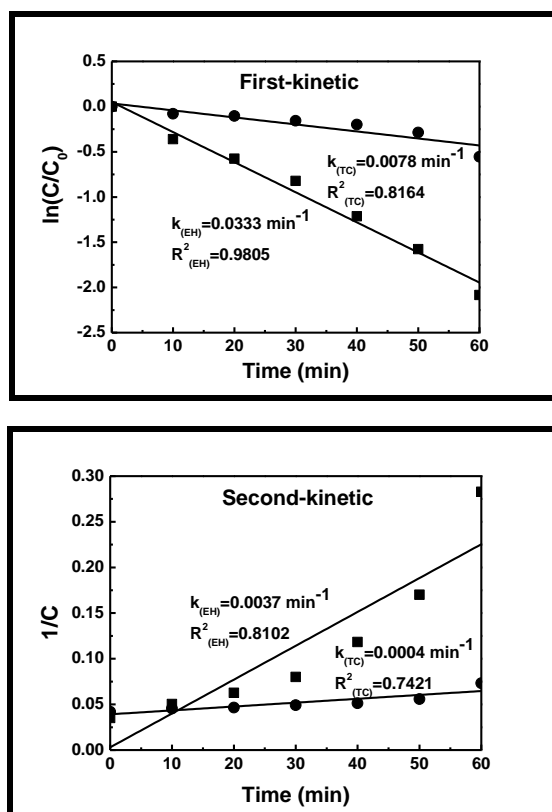

Fig. S5 First-kinetic and second-kinetic of degradation of the single antibiotic solution with MCIP

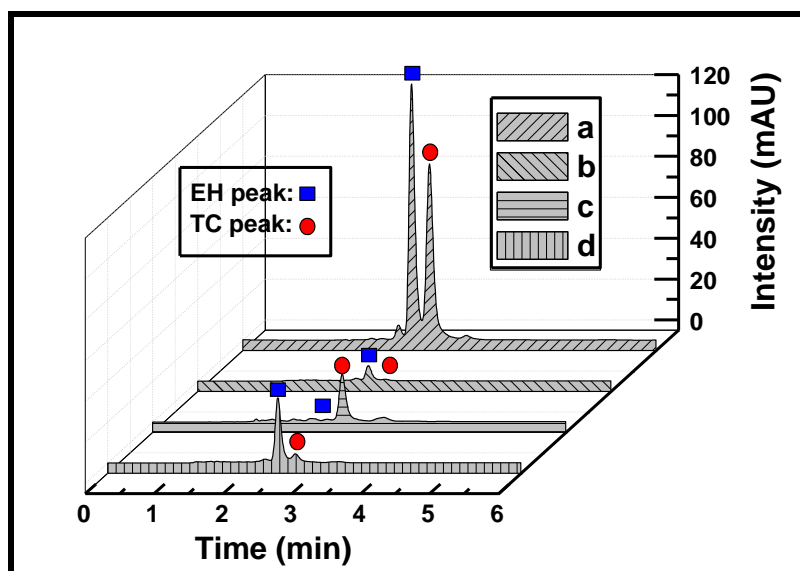

Fig. S6 HPLC spectra of the binary antibiotic solution (a), degradation of the binary antibiotic solution with TMFFC in 60 min under visible light irradiation (b), degradation of the binary antibiotic solution with MCIP in 60 min under visible light irradiation (c), degradation of the

binary antibiotic solution with MCNIP in 60 min under visible light irradiation (d)

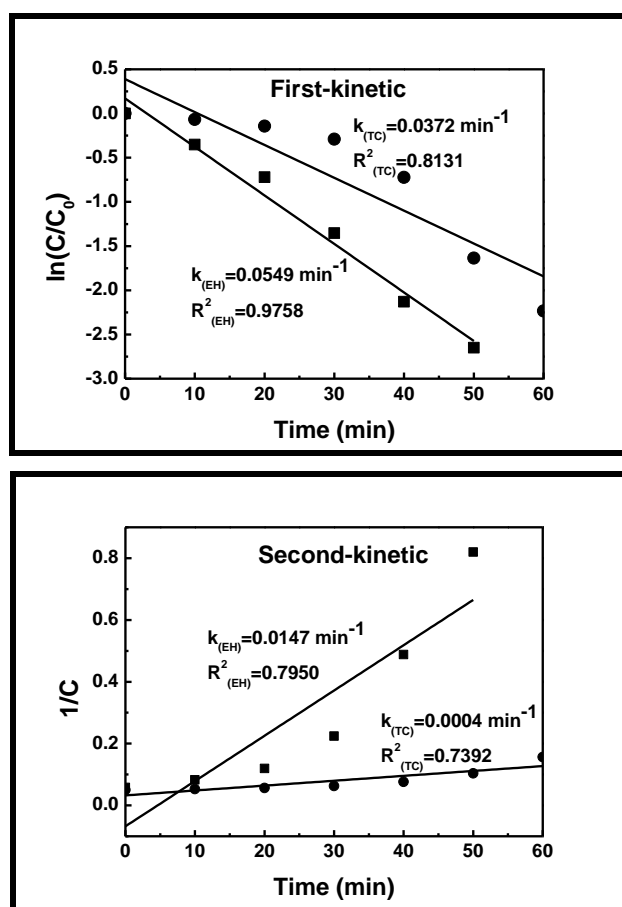

Fig. S7 First-kinetic and second-kinetic of degradation of the binary antibiotic solution with MCIP
